# Supplementary material
Source: Springer Nature journal article supplement (https://www.springermedizin.de/resource/supplementary/13023_2009_180_MOESM3_ESM.pdf/9641802)

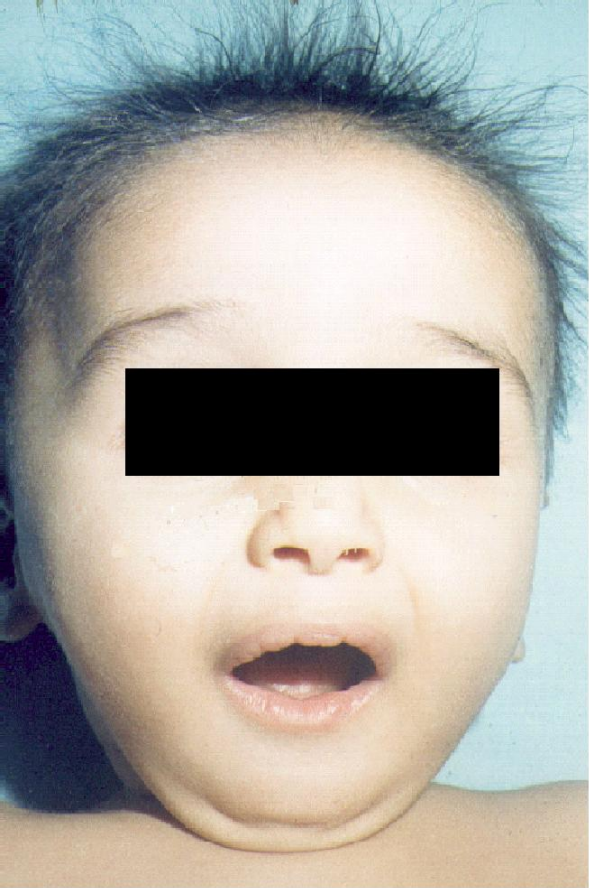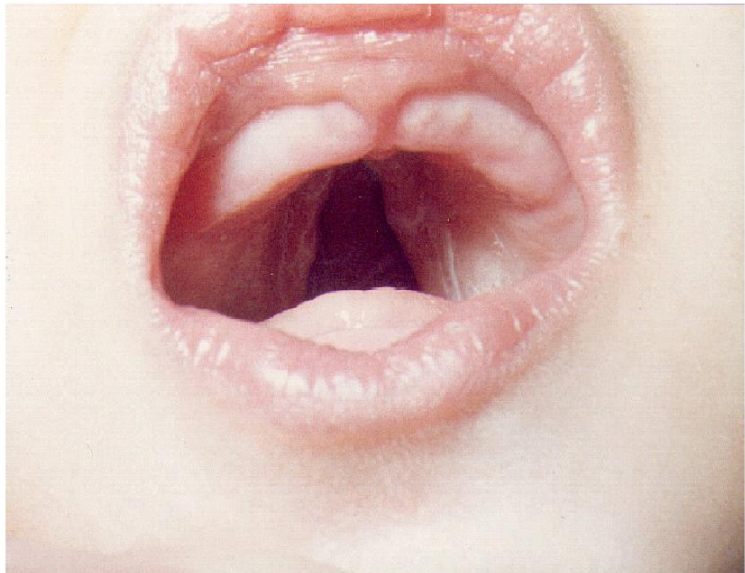

Supplement: MOESM3 [file 9641802]
